# Supplementary material for: Local complement activation is associated with primary graft dysfunction after lung transplantation
Source: JCI journal article supplement (doi:10.1172/jci.insight.138358), 2020-08-05
Supplement: sd2 [file 2]

## **Multiple files are bound together in this PDF Package.**

Adobe recommends using Adobe Reader or Adobe Acrobat version 8 or later to work with documents contained within a PDF Package. By updating to the latest version, you'll enjoy the following benefits:

- Efficient, integrated PDF viewing
- Easy printing
- Quick searches

**Don't have the latest version of Adobe Reader?**

**[Click here to download the latest version of Adobe Reader](#)**

**If you already have Adobe Reader 8,  
click a file in this PDF Package to view it.**
